# Supplementary material for: Non-deep physiological dormancy and germination characteristics of Primula florindae (Primulaceae), a rare alpine plant in the Hengduan Mountains of southwest China
Source: PeerJ. 2023 Apr 28;11:e15234. doi: 10.7717/peerj.15234 (PMC10150718; doi:10.7717/peerj.15234)
Supplement: File S1 — Each space is the number of seed germination in each day after seed sowing. [file peerj-11-15234-s001.xlsx]

## Sheet: SJL-Fresh
Temperature	Germination day	1℃				5℃				10℃				15℃				20℃				25℃				30℃				5/1℃
GA3 Concentration		0				0				0				0				0				0				0				0
Repeat		1	2	3	4	1	2	3	4	1	2	3	4	1	2	3	4	1	2	3	4	1	2	3	4	1	2	3	4	1	2	3	4
Final germination(dark)		0	0	0	0	0	0	0	0					0	1	0	0					7	4	5	2					0	0	0	0
Total sample(dark)		10	10	10	10	9	10	10	10					10	10	10	10					15	15	15	15					10	10	10	10
Number of decay(dark)														1	3	1	0					7	5	4	1
Number of fresh(dark)		10	10	10	10	9	10	10	10					9	6	9	10					1	6	6	12					10	10	10	10
Empty flat number(dark)
Final germination(light)		0	0	0	0	0	1	1	1	4	2	3	3	4	3	4	4	8	9	7	10	9	7	10	8	6	1	5	7	1	6	2	4
Total sample(light)		10	10	10	10	10	10	10	10	10	10	10	10	10	10	10	10	10	10	10	10	10	7	10	10	10	10	10	10	10	10	10	10
Number of decay(light)						1					1	1										1				4	6	4	3
Number of fresh(light)						9	9	9	9	6	7	6	7	6	7	6	6	2	1	3					2		3	1		9	4	8	6
Empty flat number(light)
	1	0	0	0	0	0	0	0	0	0	0	0	0	0	0	0	0	0	0	0	0	0	0	0	0	0	0	0	0	0	0	0	0
	2	0	0	0	0	0	0	0	0	0	0	0	0	0	0	0	0	0	0	0	0	0	0	0	0	0	0	0	0	0	0	0	0
	3	0	0	0	0	0	0	0	0	0	0	0	0	0	0	0	0	0	0	0	0	0	0	0	0	0	0	0	0	0	0	0	0
	4	0	0	0	0	0	0	0	0	0	0	0	0	0	0	0	0	0	1	1	0	0	2	0	1	0	0	0	0	0	0	0	0
	5	0	0	0	0	0	0	0	0	0	0	0	0	1	1	0	0	1	0	0	0	1	0	0	1	0	0	0	0	0	0	0	0
	6	0	0	0	0	0	0	0	0	0	0	0	0	0	0	0	1	1	2	2	1	1	2	0	2	0	0	0	0	0	0	0	0
	7	0	0	0	0	0	0	0	0	0	0	0	0	0	0	2	0	2	1	1	3	3	0	4	2	0	0	0	0	0	0	0	0
	8	0	0	0	0	0	0	0	0	0	0	0	0	0	0	0	0	0	0	1	2	0	1	1	0	0	0	0	0	0	0	0	0
	9	0	0	0	0	0	0	0	0	0	0	0	0	1	0	0	0	0	1	1	2	0	0	0	1	0	0	0	0	0	0	0	0
	10	0	0	0	0	0	0	0	0	1	1	1	0	0	0	0	0	2	1	0	0	1	0	1	0	0	0	0	0	0	0	0	0
	11	0	0	0	0	0	0	0	0	0	0	0	0	1	1	2	0	0	2	0	1	0	1	1	0	0	0	0	0	0	0	0	0
	12	0	0	0	0	0	0	0	0	1	0	0	0	0	1	0	0	0	0	0	0	1	0	1	0	0	0	0	0	0	0	0	0
	13	0	0	0	0	0	0	0	0	1	0	0	0	0	0	0	0	0	0	1	1	1	0	1	0	0	0	0	0	0	0	0	0
	14	0	0	0	0	0	0	0	0	0	0	0	1	0	0	0	0	2	0	0	end	1	1	0	1	0	0	0	2	0	0	0	0
	15	0	0	0	0	0	0	0	0	0	0	0	0	0	0	0	0	0	1	0		end	end	0	0	0	0	1	2	0	0	0	0
	16	0	0	0	0	0	0	0	0	1	0	0	1	0	0	0	1	0	0	0				0	0	1	0	1	0	0	0	0	0
	17	0	0	0	0	0	0	0	0	0	0	0	0	0	0	0	1	0	0	0				0	0	1	0	0	0	0	0	0	0
	18	0	0	0	0	0	0	0	0	0	1	0	0	0	0	0	0	0	0	0				0	0	0	0	0	0	0	2	0	1
	19	0	0	0	0	0	0	0	0	0	0	0	0	0	0	0	0	0	0	0				1	0	0	0	1	0	0	0	1	0
	20	0	0	0	0	0	0	0	0	0	0	0	0	1	0	0	1	end	end	end				end	end	2	0	2	0	0	1	0	0
	21	0	0	0	0	0	0	0	0	0	0	0	0	0	0	0	0									1	0	0	0	0	0	1	0
	22	0	0	0	0	0	0	0	0	0	0	1	0	0	0	0	0									0	0	0	2	0	0	0	1
	23	0	0	0	0	0	0	1	1	0	0	0	0	0	0	0	0									0	0	0	0	0	0	0	0
	24	0	0	0	0	0	0	0	0	0	0	0	0	0	0	0	0									0	0	0	0	1	2	0	2
	25	0	0	0	0	0	0	0	0	0	0	1	0	0	0	0	0									0	0	0	0	0	1	0	0
	26	0	0	0	0	0	0	0	0	0	0	0	1	0	0	0	0									0	0	0	0	0	0	0	0
	27	0	0	0	0	0	0	0	0	0	0	0	0	0	0	0	0									1	1	0	1	0	0	0	0
	28	0	0	0	0	0	1	0	0	0	0	0	0	0	0	0	0									0	0	0	0	0	0	0	0

## Sheet: SJL-GA3
Temperature	Germination day	25/15℃																				15/5℃
GA3 Concentration		0				20 mg/L				200 mg/L				400 mg/L				800 mg/L				0				20 mg/L				200 mg/L				400 mg/L				800 mg/L
Repeat		1	2	3	4	1	2	3	4	1	2	3	4	1	2	3	4	1	2	3	4	1	2	3	4	1	2	3	4	1	2	3	4	1	2	3	4	1	2	3	4
Final germination(dark)		1	1	1	0	6	4	5	3	10	10	10	10	10	10	10	10	10	10	10	10	0	2	1	0	3	3	4	6	8	9	8	7	10	8	8	7	6	4	8	7
Total sample(dark)		10	10	10	10	10	10	10	10	10	10	10	10	10	10	10	10	10	10	10	10	10	10	10	10	10	10	9	10	10	10	10	10	10	10	10	10	10	10	10	10
Number of decay(dark)					2	1	1	1	2													0	0	1	0	1	2			1	1	2	1		2	2	3	4	6	2	3
Number of fresh(dark)		9	9	9	8	3	5	4	5													10	8	8	10	6	5	5	4	1			2
Empty flat number(dark)
Final germination(light)		4	8	9	9	9	10	8	10	10	10	10	7	10	9	10	10	10	10	10	10	6	7	5	4	6	6	0	0	9	9	10	10	10	9	10	8	9	10	9	7
Total sample(light)		10	10	10	10	10	10	9	10	10	10	10	8	10	10	10	10	11	10	10	10	10	10	10	11	10	10	0	0	10	10	10	10	10	10	10	9	10	10	10	9
Number of decay(light)		2			1								1		1			1							1	1	2			1					1		1	1		1	2
Number of fresh(light)		4	2	1		1		1														4	3	5	6	3	2				1
Empty flat number(light)					1
	1	0	0	0	0	0	0	0	0	0	0	0	0	0	0	0	0	0	0	0	0	0	0	0	0	0	0			0	0	0	0	0	0	0	0	0	0	0	0
	2	0	0	0	0	0	0	0	0	0	0	0	0	0	0	0	0	0	0	0	0	0	0	0	0	0	0			0	0	0	0	0	0	0	0	0	0	0	0
	3	0	0	0	0	0	0	0	0	0	0	0	0	0	0	0	0	0	0	0	0	0	0	0	0	0	0			0	0	0	0	0	0	0	0	0	0	0	0
	4	0	3	1	0	0	1	3	2	0	2	3	0	3	4	1	3	2	2	1	1	0	0	0	0	0	0			0	0	0	0	0	0	0	0	0	0	0	0
	5	2	0	0	1	4	5	0	0	3	5	2	3	3	3	3	3	4	2	2	3	0	0	0	0	0	0			0	0	0	0	0	0	0	0	0	0	0	0
	6	0	1	0	2	2	3	2	6	5	3	4	3	2	0	3	1	3	5	4	4	0	0	0	0	0	0			0	0	0	0	0	0	0	0	0	0	0	0
	7	0	1	3	0	0	0	0	0	1	end	0	0	1	1		2	0	0	1	1	0	0	0	0	0	0			0	0	0	0	0	0	0	0	0	0	0	0
	8	0	1	1	2	1	0	1	1	1		1	1	1	0	2	1	1	1	1	1	0	0	0	0	0	0			0	0	0	0	0	0	0	0	0	0	0	0
	9	0	0	2	0	1	0	0	0	end		end	end	end	1	1	end	end	end	0	end	0	0	0	0	0	0			0	0	0	0	0	1	1	0	0	0	0	0
	10	1	1	0	0	0	0	1	0						end	end				0		0	0	0	0	0	0			0	0	1	3	2	1	0	2	1	2	2	0
	11	0	0	0	1	1	1	0	0											1		0	0	0	0	2	1			0	1	1	1	1	1	5	2	1	3	0	4
	12	0	0	2	0	0	end	1	0											end		0	1	1	1	0	0			4	2	4	2	5	3	2	3	2	2	2	3
	13	0	0	0	0	0		0	1													1	0	0	1	0	2			0	2	1	2	1	0	1	0	2	0	2	end
	14	0	0	0	1	0		0	end													0	1	1	1	2	1			2	3	2	2	1	3	1	1	2	2	3
	15	1	0	0	0	0		0														0	0	0	1	0	0			1	0	0	end	end	end	end	end	1	1	end
	16	0	0	0	0	0		0														1	0	1	0	0	1			2	0	1						end	end
	17	0	0	0	0	0		0														0	0	1	0	0	0			end	0	end
	18	0	1	0	0	0		0														1	1	0	0	1	0				1
	19	0	0	0	0	0		0														1	1	0	0	0	0				0
	20	0	0	0	1	end		end														0	1	0	0	1	1				end
	21	0	0	0	0																	0	1	0	0	0	0
	22	0	0	0	1																	0	0	0	0	0	0
	23	0	0	0	0																	1	1	0	0	0	0
	24	0	0	0	0																	0	0	0	0	0	0
	25	0	0	0	0																	1	0	1	0	0	0
	26	0	0	0	0																	0	0	0	0	0	0
	27	0	0	0	0																	0	0	0	0	0	0
	28	0	0	0	0																	0	0	0	0	0	0

## Sheet: SJL-DAR-3months
Temperature	Germination day	5℃				10℃				15℃				20℃				25℃				30℃				5/1℃				15/5℃				25/15℃
GA3 Concentration		0				0				0				0				0				0				0				0				0
Repeat		1	2	3	4	1	2	3	4	1	2	3	4	1	2	3	4	1	2	3	4	1	2	3	4	1	2	3	4	1	2	3	4	1	2	3	4
Final germination(dark)		0	0	0	0					0	0	0	0					2	2	4	2					0	0	0	0	3	2	0	1	0	1	2	0
Total sample(dark)		10	10	10	10					10	10	10	10					10	10	10	10					10	10	10	10	10	10	10	10	10	10	10	10
Number of decay(dark)		2		1						1	1		2					1	1																	1
Number of fresh(dark)		8	10	9	10					9	9	10	8					7	7	6	8					10	10	10	10	7	8	10	9	10	9	7	10
Empty flat number(dark)
Final germination(light)		4	4	8	5	3	4	1	5	5	3	5	5	8	8	10	10	10	10	8	7	6	6	5	5	5	6	8	7	7	9	13	8	11	9	10	8
Total sample(light)		10	11	10	10	11	10	10	10	10	10	11	10	10	10	10	10	10	10	10	10	10	10	10	10	10	9	10	10	10	10	13	10	11	10	10	10
Number of decay(light)			1		1				1			1		2	1					2	3	4	3	2	5			1	1	2			1
Number of fresh(light)		6	6	2	4	8	6	9	4	5	7	5	5		1								1	3		5	3	1	2	1	1		1		1		2
Empty flat number(light)																																				1
	1	0	0	0	0	0	0	0	0	0	0	0	0	0	0	0	0	0	0	0	0	0	0	0	0	0	0	0	0	0	0	0	0	0	0	0	0
	2	0	0	0	0	0	0	0	0	0	0	0	0	0	0	0	0	0	0	0	0	0	0	0	0	0	0	0	0	0	0	0	0	0	0	0	0
	3	0	0	0	0	0	0	0	0	0	0	0	0	0	0	0	0	0	0	0	0	0	0	0	0	0	0	0	0	0	0	0	0	0	0	0	0
	4	0	0	0	0	0	0	0	0	0	0	0	0	0	0	0	0	0	0	0	0	0	0	0	0	0	0	0	0	0	0	0	0	0	0	0	0
	5	0	0	0	0	0	0	0	0	0	0	0	0	5	3	3	2	2	4	1	1	0	0	0	0	0	0	0	0	0	0	0	0	1	0	2	1
	6	0	0	0	0	0	0	0	0	2	0	1	0	0	3	7	5	5	2	2	2	0	0	0	0	0	0	0	0	0	0	0	0	8	3	2	2
	7	0	0	0	0	0	0	0	0	1	2	3	4	1	1	end	1	1	0	0	0	0	0	0	0	0	0	0	0	0	0	0	0	1	3	2	4
	8	0	0	0	0	1	0	0	0	1	0	1	1	2	0		0	1	3	3	1	0	0	0	0	0	0	0	0	0	0	0	0	0	0	0	1
	9	0	0	0	0	0	0	0	0	1	1	0	0	end	1		0	0	1	0	1	0	0	1	0	0	0	0	0	0	0	0	0	1	1	0	0
	10	0	0	0	0	0	2	0	2	0	0	0	0		end		0	0	end	1	2	0	1	2	2	0	0	0	0	0	1	1	0	end	0	1	0
	11	0	0	0	0	0	0	0	0	0	0	0	0				1	1		0	0	0	0	0	0	0	0	0	0	2	2	5	1		0	1	0
	12	0	1	1	0	0	1	1	1	0	0	0	0				0	end		1	0	1	1	1	0	0	0	0	0	2	2	3	1		0	0	0
	13	0	0	0	0	1	0	0	0	0	0	0	0				0			end	0	0	1	0	1	0	0	0	0	0	1	3	1		0	1	0
	14	1	1	2	1	0	0	0	1	0	0	0	0				1				end	2	0	0	0	0	0	0	0	1	1	0	1		1	1	0
	15	1	1	2	1	0	0	0	1	0	0	0	0				end					2	0	0	1	0	0	0	0	1	1	0	2		0	0	0
	16	0	0	0	0	0	0	0	0	0	0	0	0									1	1	0	0	0	1	4	1	0	0	1	1		0	0	0
	17	0	0	0	0	0	1	0	0	0	0	0	0									0	1	0	0	0	1	0	2	1	0	end	1		0	0	0
	18	1	0	1	2	0	0	0	0	0	0	0	0									0	1	1	1	1	2	0	2	0	1		0		0	0	0
	19	0	0	0	0	1	0	0	0	0	0	0	0									0	0	0	0	0	0	2	0	0	0		0		0	0	0
	20	1	0	0	0	0	0	0	0	0	0	0	0									0	0	0	0	0	0	1	1	0	0		0		0	0	0
	21	0	0	1	0	0	0	0	0	0	0	0	0									0	0	0	0	1	1	0	1	0	0		0		0	0	0
	22	0	0	0	0	0	0	0	0	0	0	0	0									0	0	0	0	0	0	0	0	0	0		0		0	0	0
	23	0	0	0	0	0	0	0	0	0	0	0	0									0	0	0	0	1	0	0	0	0	0		0		0	0	0
	24	0	0	0	0	0	0	0	0	0	0	0	0									0	0	0	0	1	1	0	0	0	0		0		0	0	0
	25	0	1	0	1	0	0	0	0	0	0	0	0									0	0	0	0	0	0	1	0	0	0		0		0	0	0
	26	0	0	0	0	0	0	0	0	0	0	0	0									0	0	0	0	1	0	0	0	0	0		0		0	0	0
	27	0	0	1	0	0	0	0	0	0	0	0	0									0	0	0	0	0	0	0	0	0	0		0		1	0	0
	28	0	0	0	0	0	0	0	0	0	0	0	0									0	0	0	0	0	0	0	0	0	0		0		0	0	0

## Sheet: SJL-CS-3months
Temperature	Germination day	5℃				10℃				15℃				20℃				25℃				30℃				5/1℃				15/5℃				25/15℃
GA3 Concentration		0				0				0				0				0				0				0				0				0
Repeat		1	2	3	4	1	2	3	4	1	2	3	4	1	2	3	4	1	2	3	4	1	2	3	4	1	2	3	4	1	2	3	4	1	2	3	4
Final germination(dark)		2	3	5	4					5	10	8	10					8	9	10	9					4	1	6	5	9	10	9	7	8	9	8	10
Total sample(dark)		10	10	10	10					10	10	10	10					10	10	10	10					10	10	10	10	10	10	10	10	10	10	10	10
Number of decay(dark)			1		1													1			1
Number of fresh(dark)		8	6	5	5					5		2						1	1							6	9	4	5	1		1	3	2	1	2
Empty flat number(dark)
Final germination(light)		10	10	10	10	10	10	10	10	10	10	9	10	10	10	10	10	10	10	10	10	8	5	6	4	10	10	10	10	8	10	10	10	10	10	9	10
Total sample(light)		10	10	10	10	10	10	10	10	10	10	10	10	10	10	10	10	10	10	10	10	10	10	10	10	10	10	10	10	10	10	10	10	11	10	9	10
Number of decay(light)												1										2	5	3	6					2				1
Number of fresh(light)
Empty flat number(light)
	1	0	0	0	0	0	0	0	0	0	0	0	0	0	0	0	0	0	0	0	0	0	0	0	0	0	0	0	0	0	0	0	0	0	0	0	0
	2	0	0	0	0	0	0	0	0	0	0	0	0	0	0	0	0	0	0	0	0	0	0	0	0	0	0	0	0	0	0	0	0	0	0	0	0
	3	0	0	0	0	0	0	0	0	0	0	1	0	4	8	5	6	2	3	3	2	0	0	0	0	0	0	0	0	0	0	0	0	3	1	2	1
	4	0	0	0	0	0	0	0	0	0	0	0	0	2	2	1	0	1	2	1	1	0	0	0	0	0	0	0	0	0	0	0	0	0	1	2	0
	5	0	0	0	0	0	0	0	0	6	8	4	6	0	end	2	2	3	2	4	5	2	0	0	0	0	0	0	0	0	0	0	0	6	7	5	7
	6	0	0	0	0	0	1	0	0	2	1	4	4	2		1	1	3	2	1	2	0	0	0	0	0	0	0	0	0	0	0	0	1	0	0	2
	7	0	0	0	0	3	3	6	2	1	1	end	end	1		1	1	0	1	0	end	0	0	1	0	0	0	0	0	0	1	0	1	0	1	0	end
	8	0	0	0	0	6	5	2	6	1	end			1		end	end	0	end	0		0	0	0	1	0	0	0	0	0	4	6	4	0	end	end
	9	0	0	1	0	0	1	2	2	end				end				1		0		1	1	0	0	0	0	0	0	3	2	1	3	0
	10	0	0	1	0	1	end	end	end									end		1		0	1	3	0	0	0	0	0	5	2	2	1	0
	11	5	2	4	6	end														end		0	0	1	1	0	0	0	0	0	1	1	0	0
	12	4	8	4	2																	0	1	0	0	2	1	0	0	0	end	end	1	0
	13	0	end	end	1																	3	1	0	1	1	0	0	0	end			end	0
	14	0			0																	1	0	0	0	3	2	0	1					0
	15	0			0																	1	0	0	1	2	2	0	1					0
	16	1			1																	0	0	0	0	1	1	4	1					end
	17	end			end																	0	0	0	0	1	2	3	4
	18																					0	0	1	0	end	2	3	3
	19																					0	0	0	0		end	end	end
	20																					0	1	0	0
	21																					0	0	0	0
	22																					0	0	0	0
	23																					0	0	0	0
	24																					0	0	0	0
	25																					0	0	0	0
	26																					0	0	0	0
	27																					0	0	0	0
	28																					0	0	0	0

## Sheet: SJL-DAR-6months
Temperature	Germination day	5℃				10℃				15℃				20℃				25℃				30℃				5/1℃				15/5℃				25/15℃
GA3 Concentration		0				0				0				0				0				0				0				0				0
Repeat		1	2	3	4	1	2	3	4	1	2	3	4	1	2	3	4	1	2	3	4	1	2	3	4	1	2	3	4	1	2	3	4	1	2	3	4
Final germination(dark)		0	0	0	0					0	0	1	0					1	2	3	2					0	0	0	0	1	1	1	0	2	1	1	0
Total sample(dark)		10	10	10	10					10	10	10	10					10	9	10	10					10	10	10	10	10	10	10	10	9	10	10	10
Number of decay(dark)												2						1											1				1
Number of fresh(dark)		10	10	10	10					10	10	7	10					8	7	7	8					10	10	10	9	9	9	9	9	7	9	9	10
Empty flat number(dark)																			1	1														1
Final germination(light)		6	13	9	11	2	4	7	2	5	6	7	8	6	9	9	7	7	7	10	9	6	5	4	4	7	4	6	4	7	6	7	8	8	12	10	9
Total sample(light)		19	19	20	20	10	10	10	10	10	10	10	10	10	11	10	10	10	10	10	10	10	10	10	10	12	8	10	11	10	10	11	10	10	12	11	9
Number of decay(light)		2	2	1			1							2	1			3	2		1		1	2	2							1	1	1		1
Number of fresh(light)		11	4	10	9	8	5	3	8	5	4	3	2	2	1	1	3		1			4	4	4	3	5	4	4	7	3	4	3	1	1
Empty flat number(light)
	1	0	0	0	0	0	0	0	0	0	0	0	0	0	0	0	0	0	0	0	0	0	0	0	0	0	0	0	0	0	0	0	0	0	0	0	0
	2	0	0	0	0	0	0	0	0	0	0	0	0	0	0	0	0	0	0	0	0	0	0	0	0	0	0	0	0	0	0	0	0	0	0	0	0
	3	0	0	0	0	0	0	0	0	0	0	0	0	0	0	0	0	0	0	0	0	0	0	0	0	0	0	0	0	0	0	0	0	0	0	0	0
	4	0	0	0	0	0	0	0	0	0	0	0	0	0	0	0	0	0	0	0	0	0	0	0	0	0	0	0	0	0	0	0	0	0	0	0	0
	5	0	0	0	0	0	0	0	0	0	0	0	0	2	3	0	2	1	3	3	0	0	0	0	0	0	0	0	0	0	0	0	0	1	4	0	1
	6	0	0	0	0	0	0	0	0	2	3	2	2	0	2	6	4	1	1	3	1	0	0	0	0	0	0	0	0	0	0	0	0	4	2	3	3
	7	0	0	0	0	0	0	0	0	2	2	3	4	0	2	1	0	2	1	3	2	0	0	0	0	0	0	0	0	0	0	0	0	1	1	1	1
	8	0	0	0	0	0	0	0	1	1	1	2	1	0	1	1	0	1	0	1	0	0	0	0	0	0	0	0	0	0	0	0	0	1	1	2	0
	9	0	0	0	0	1	1	2	1	0	0	0	0	0	0	0	0	1	0	end	1	1	0	0	2	0	0	0	0	1	1	0	1	1	2	2	3
	10	0	0	0	0	0	1	1	0	0	0	0	1	2	0	1	1	0	0		0	1	0	1	0	0	0	0	0	2	1	1	3	0	0	0	0
	11	0	1	0	1	0	0	2	0	0	0	0	0	1	0	0	0	0	1		1	0	0	1	0	0	0	0	0	2	3	0	3	0	0	1	0
	12	0	1	0	1	1	1	0	0	0	0	0	0	0	0	0	0	1	1		0	1	0	0	1	0	0	0	0	1	0	1	0	0	0	0	0
	13	0	1	1	0	0	0	0	0	0	0	0	0	0	0	0	0	0	0		1	1	0	1	0	0	0	1	1	1	0	0	0	0	0	0	1
	14	0	0	1	1	0	0	1	0	0	0	0	0	0	0	0	0	0	0		0	0	0	0	0	0	0	1	0	0	1	2	0	0	1	0	end
	15	1	1	0	0	0	0	0	0	0	0	0	0	0	0	0	0	0	0		0	0	0	0	1	2	0	1	1	0	0	2	0	0	0	1
	16	0	1	1	0	0	1	0	0	0	0	0	0	0	0	0	0	0	0		0	0	1	0	0	0	0	0	0	0	0	0	0	0	1	end
	17	1	0	1	0	0	0	1	0	0	0	0	0	0	0	0	0	0	0		0	1	1	0	0	0	0	1	0	0	0	0	0	0	end
	18	0	0	2	1	0	0	0	0	0	0	0	0	0	0	0	0	0	0		0	1	0	0	0	0	1	0	0	0	0	1	1	0
	19	1	1	1	1	0	0	0	0	0	0	0	0	0	0	0	0	0	0		1	0	1	0	0	0	0	1	0	0	0	0	0	0
	20	1	1	0	2	0	0	0	0	0	0	0	0	1	0	0	0	0	0		1	0	0	0	0	2	0	0	1	0	0	0	0	end
	21	0	1	0	0	0	0	0	0	0	0	0	0	0	0	0	0	0	0		1	0	0	1	0	2	1	0	1	0	0	0	0
	22	1	2	1	0	0	0	0	0	0	0	0	0	0	1	0	0	end	end		end	0	1	0	0	0	0	1	0	0	0	0	0
	23	1	0	0	1	0	0	0	0	0	0	0	0	0	0	0	0					0	0	0	0	0	0	0	0	0	0	0	0
	24	0	1	0	0	0	0	0	0	0	0	0	0	0	0	0	0					0	1	0	0	0	1	0	0	0	0	0	0
	25	0	0	0	1	0	0	0	0	0	0	0	0	0	0	0	0					0	0	0	0	0	0	0	0	0	0	0	0
	26	0	0	1	1	0	0	0	0	0	0	0	0	0	0	0	0					0	0	0	0	1	0	0	0	0	0	0	0
	27	0	1	0	0	0	0	0	0	0	0	0	0	end	end	end	end					0	0	0	0	0	0	0	0	0	0	0	0
	28	0	1	0	1	0	0	0	0	0	0	0	0									0	0	0	0	0	0	0	0	0	0	0	0

## Sheet: SJL-CS-6months
Temperature	Germination day	5℃				10℃				15℃				20℃				25℃				30℃				5/1℃				15/5℃				25/15℃
GA3 Concentration		0				0				0				0				0				0				0				0				0
Repeat		1	2	3	4	1	2	3	4	1	2	3	4	1	2	3	4	1	2	3	4	1	2	3	4	1	2	3	4	1	2	3	4	1	2	3	4
Final germination(dark)		7	6	6	7					10	9	9	10					10	9	10	10					7	8	9	7	10	9	10	9	10	10	10	10
Total sample(dark)		10	10	10	10					10	10	10	10					10	10	10	10					10	10	10	10	10	10	10	10	10	10	10	10
Number of decay(dark)												1
Number of fresh(dark)		3	4	4	3						1								1							3	2	1	3		1		1
Empty flat number(dark)
Final germination(light)		10	10	10	10	10	10	10	10	10	10	10	9	9	10	10	10	10	10	10	10	4	4	9	9	10	10	10	10	10	10	10	10	10	10	10	10
Total sample(light)		10	10	10	10	10	10	10	10	10	10	10	10	10	10	10	10	10	10	10	10	10	10	10	10	10	10	10	10	10	10	10	10	10	10	10	10
Number of decay(light)													1
Number of fresh(light)														1								6	6	1	1
Empty flat number(light)
	1	0	0	0	0	0	0	0	0	0	0	0	0	0	0	0	0	0	0	0	0	0	0	0	0	0	0	0	0	0	0	0	0	0	0	0	0
	2	0	0	0	0	0	0	0	0	0	0	0	0	0	0	0	0	0	0	0	0	0	0	0	0	0	0	0	0	0	0	0	0	0	0	0	0
	3	0	0	0	0	0	0	0	0	0	0	1	0	0	0	2	0	1	1	1	1	0	0	0	0	0	0	0	0	0	0	0	0	0	0	0	1
	4	0	0	0	0	0	0	0	0	0	3	2	4	6	7	6	8	6	6	6	7	0	0	1	1	0	0	0	0	0	0	0	0	8	4	6	5
	5	0	0	0	0	0	0	1	0	6	3	6	3	3	2	2	2	3	1	1	2	0	0	1	1	0	0	0	0	0	0	0	0	2	6	4	4
	6	0	0	0	0	1	2	3	3	4	4	1	2	0	0	end	end	end	2	2	end	1	0	0	1	0	0	0	0	1	2	2	3	end	end	end	end
	7	0	0	0	0	5	4	4	4	end	end	end	end	0	1				end	end		0	1	1	1	0	0	0	0	1	4	3	2
	8	3	4	5	3	4	4	2	3					0	end							0	0	1	1	0	0	0	0	3	3	3	3
	9	4	4	3	4	end	end	end	end					end								1	0	1	1	0	0	0	0	5	1	2	2
	10	1	1	1	2																	1	1	1	1	0	0	0	0	end	end	end	end
	11	2	1	1	1																	1	1	1	0	6	3	4	8
	12	end	end	end	end																	0	0	0	0	2	3	3	1
	13																					0	0	0	0	0	1	2	1
	14																					0	0	1	1	1	1	1	end
	15																					0	0	1	1	0	1	end
	16																					0	0	0	0	1	1
	17																					0	0	0	0	end	end
	18																					0	0	0	0
	19																					0	1	0	0
	20																					0	0	0	0
	21																					0	0	0	0
	22																					end	end	end	end
	23
	24
	25
	26
	27
	28
