# Supplementary material for: Non-deep physiological dormancy and germination characteristics of Primula florindae (Primulaceae), a rare alpine plant in the Hengduan Mountains of southwest China
Source: PeerJ. 2023 Apr 28;11:e15234. doi: 10.7717/peerj.15234 (PMC10150718; doi:10.7717/peerj.15234)
Supplement: File S2 — Each space is the number of seed germination in each day after seed sowing. [file peerj-11-15234-s002.xlsx]

## Sheet: LL-Fresh
Temperature	Germination day	1℃				5℃				10℃				15℃				20℃				25℃				30℃				5/1℃
GA3 Concentration		0				0				0				0				0				0				0				0
Repeat		1	2	3	4	1	2	3	4	1	2	3	4	1	2	3	4	1	2	3	4	1	2	3	4	1	2	3	4	1	2	3	4
Final germination(dark)		0	0	0	0	0	0	0	0					0	0	0	0					0	0	0	0					0	0	0	0
Total sample(dark)		0	0	0	0	0	0	0	0					0	0	0	0					0	0	0	0					0	0	0	0
Number of decay(dark)														2	0	1	1						1
Number of fresh(dark)		15	15	15	15	15	15	15	15					13	15	14	14					15	14	15	15					15	15	15	15
Empty flat number(dark)
Final germination(light)		0	0	0	0	1	4	0	3	4	3	6	7	4	3	2	3	12	12	11	9	11	10	11	11	10	11	11	7	5	6	5	4
Total sample(light)		15	15	15	15	15	14	14	15	15	15	16	15	15	15	15	15	15	15	15	15	15	15	14	14	16	15	14	15	19	18	19	17
Number of decay(light)								1	1	1	0	1	0	0	0	2	0	0	1	1	2	3		2		2	1	1	5	0	0	1	2
Number of fresh(light)						14	10	13	11	10	12	9	8	11	12	11	12	3	2	3	4	1	5	1	3	4	3	2	3	14	12	13	11
Empty flat number(light)
	1	0	0	0	0	0	0	0	0	0	0	0	0	0	0	0	0	0	0	0	0	0	0	0	0	0	0	0	0	0	0	0	0
	2	0	0	0	0	0	0	0	0	0	0	0	0	0	0	0	0	0	0	0	0	0	0	0	0	0	0	0	0	0	0	0	0
	3	0	0	0	0	0	0	0	0	0	0	0	0	0	0	0	0	0	0	0	0	0	0	0	0	0	0	0	0	0	0	0	0
	4	0	0	0	0	0	0	0	0	0	0	0	0	0	0	0	0	0	0	0	0	0	0	0	1	0	0	0	0	0	0	0	0
	5	0	0	0	0	0	0	0	0	0	0	0	0	0	0	0	0	0	1	0	2	3	0	0	0	0	0	0	0	0	0	0	0
	6	0	0	0	0	0	0	0	0	0	0	0	0	1	0	0	0	2	0	3	2	2	1	0	1	0	0	0	0	0	0	0	0
	7	0	0	0	0	0	0	0	0	0	0	1	0	0	0	0	0	0	0	1	0	1	3	0	2	0	0	0	0	0	0	0	0
	8	0	0	0	0	0	0	0	0	0	0	0	0	1	0	0	0	1	0	2	0	1	1	1	2	0	0	0	0	0	0	0	0
	9	0	0	0	0	0	0	0	0	0	0	1	0	0	1	0	0	0	0	1	1	0	0	1	2	0	1	0	0	0	0	0	0
	10	0	0	0	0	0	0	0	0	0	1	0	1	0	0	0	0	0	1	2	0	2	3	2	0	0	0	0	0	0	0	0	0
	11	0	0	0	0	0	0	0	0	0	0	0	0	0	1	1	0	0	1	0	0	0	1	4	2	0	0	0	0	0	0	0	0
	12	0	0	0	0	0	0	0	0	0	0	0	0	0	0	0	0	1	1	1	0	2	0	0	0	0	0	0	0	0	0	0	0
	13	0	0	0	0	0	0	0	0	0	0	0	1	0	0	0	0	2	0	0	0	0	1	2	1	0	0	0	0	0	0	0	0
	14	0	0	0	0	0	0	0	0	0	0	1	1	0	0	0	0	1	1	1	0	0	0	0	0	1	1	2	1	0	0	0	0
	15	0	0	0	0	0	0	0	0	0	0	0	0	0	0	0	1	3	1	0	0	0	0	0	0	2	1	1	0	0	0	0	0
	16	0	0	0	0	0	0	0	0	0	0	0	0	0	1	0	0	0	1	0	0	0	0	0	0	0	2	0	0	0	0	0	0
	17	0	0	0	0	0	0	0	0	0	0	0	0	1	0	0	0	0	0	0	0	0	0	0	0	0	1	3	1	0	0	0	0
	18	0	0	0	0	0	0	0	0	1	0	1	2	0	0	0	0	1	0	0	1	0	0	0	0	1	0	0	1	0	0	0	0
	19	0	0	0	0	0	0	0	0	1	0	1	0	0	0	0	0	0	1	0	0	0	0	1	0	0	0	0	0	0	0	0	0
	20	0	0	0	0	0	0	0	0	0	0	1	0	0	0	0	1	0	1	0	1	0	0	0	0	1	1	0	1	0	0	0	0
	21	0	0	0	0	1	0	0	0	0	0	0	1	0	0	0	0	0	1	0	0	0	0	0	0	3	1	0	1	0	0	0	0
	22	0	0	0	0	0	0	0	0	0	0	0	0	0	0	0	1	0	1	0	0	end	end	end	end	0	2	1	0	0	0	0	0
	23	0	0	0	0	0	0	0	0	1	1	0	0	0	0	1	0	0	0	0	0					1	0	1	0	1	0	0	0
	24	0	0	0	0	0	0	0	0	0	0	0	0	0	0	0	0	0	0	0	1					1	1	1	1	1	0	1	0
	25	0	0	0	0	0	0	0	0	0	0	0	0	0	0	0	0	1	0	0	1					0	0	0	0	1	2	2	2
	26	0	0	0	0	0	2	0	0	0	0	0	0	0	0	0	0	0	0	0	0					0	0	2	0	0	0	0	0
	27	0	0	0	0	0	0	0	0	0	1	0	0	0	0	0	0	0	1	0	0					0	0	0	0	2	2	2	2
	28	0	0	0	0	0	2	0	3	1	0	0	1	1	0	0	0	0	0	0	0					0	0	0	1	0	2	0	0

## Sheet: LL-GA3
Temperature	Germination day	25/15℃																				15/5℃
GA3 Concentration		0				20 mg/L				200 mg/L				400 mg/L				800 mg/L				0				20 mg/L				200 mg/L				400 mg/L				800 mg/L
Repeat		1	2	3	4	1	2	3	4	1	2	3	4	1	2	3	4	1	2	3	4	1	2	3	4	1	2	3	4	1	2	3	4	1	2	3	4	1	2	3	4
Final germination(dark)		0	0	0	0	3	5	4	8	15	15	15	14	15	15	15	15	12	14	14	13	2	3	2	1	3	3	2	9	15	6	14	14	14	15	15	15	8	12	14	12
Total sample(dark)		15	15	15	15	15	15	15	15	15	15	15	15	15	15	15	15	15	15	15	15	15	15	15	15	14	15	15	15	15	15	15	15	15	15	15	15	15	15	15	15
Number of decay(dark)		1	1	1	0			1					1					3	1	1	2		1	1		1	1				9	1	1	1				7	3	1	3
Number of fresh(dark)		14	14	14	15	12	10	10	7													13	11	12	14	10	11	13	6
Empty flat number(dark)																										1
Final germination(light)		9	12	8	8	12	15	13	12	15	12	15	15	14	15	15	15	13	14	14	14	9	5	4	7	8	10	11	10	15	14	15	15	16	9	11	12	14	15	14	16
Total sample(light)		15	15	15	15	14	15	15	15	15	12	15	15	15	15	15	15	15	15	15	14	16	16	15	15	15	15	15	15	15	14	15	15	16	11	15	14	15	15	15	16
Number of decay(light)		1	1	1	1									1				2	1	1			1	1			1	1	1						2	4	2	1		1
Number of fresh(light)		5	2	6	6	2		2	3													7	10	10	8	7	4	3	4
Empty flat number(light)
	1	0	0	0	0	0	0	0	0	0	0	0	0	0	0	0	0	0	0	0	0	0	0	0	0	0	0	0	0	0	0	0	0	0	0	0	0	0	0	0	0
	2	0	0	0	0	0	0	0	0	0	0	0	0	0	0	0	0	0	0	0	0	0	0	0	0	0	0	0	0	0	0	0	0	0	0	0	0	0	0	0	0
	3	0	0	0	0	0	0	0	0	0	0	0	0	0	0	0	0	0	0	0	0	0	0	0	0	0	0	0	0	0	0	0	0	0	0	0	0	0	0	0	0
	4	0	0	0	0	0	0	0	0	1	0	3	0	2	3	2	1	0	0	0	0	0	0	0	0	0	0	0	0	0	0	0	0	0	0	0	0	0	0	0	0
	5	2	1	1	0	3	2	3	3	7	6	3	7	6	7	5	7	6	6	4	5	0	0	0	0	0	0	0	0	0	0	0	0	0	0	0	0	0	0	0	0
	6	3	1	1	0	1	3	3	4	7	4	8	6	3	4	5	5	2	2	6	5	0	0	0	0	0	0	0	0	0	0	0	0	0	0	0	0	0	0	0	0
	7	0	0	0	0	0	4	3	0	end	2	1	1	2	1	3	0	5	3	3	1	0	0	0	0	0	0	0	0	0	0	0	0	0	0	0	0	0	0	0	0
	8	1	0	1	0	2	2	0	2		end	end	1	1	end	end	1	0	3	1	1	0	0	0	0	1	0	0	0	0	0	0	0	0	0	0	0	0	0	0	0
	9	0	2	0	1	2	1	1	0				end	0			0	0	0	0	1	0	0	0	0	0	0	0	0	0	0	0	0	0	0	0	0	0	0	0	0
	10	1	0	0	0	0	1	1	0					end			0	0	0	0	1	0	0	0	0	0	0	0	0	0	0	1	0	1	0	0	1	0	1	1	2
	11	0	0	1	0	0	0	1	1								0	0	end	end	end	0	0	0	0	0	0	0	0	1	2	1	0	0	1	1	0	0	0	0	0
	12	1	0	1	0	2	2	0	0								0	end				0	0	0	0	1	1	2	1	7	2	6	4	8	5	4	4	8	8	6	7
	13	0	0	1	0	0	end	0	0								0					0	1	0	0	0	3	2	0	2	2	1	2	1	3	4	1	3	2	3	3
	14	0	0	0	0	1		0	0								1					0	0	0	1	0	0	1	0	2	2	4	2	2	0	2	4	2	2	3	2
	15	1	1	0	0	0		0	1								end					0	0	0	0	0	0	0	0	3	1	0	1	0	0	0	1	0	1	1	0
	16	0	1	1	0	0		0	0													0	0	0	1	1	0	2	1	end	1	2	2	4	0	0	1	0	1	end	2
	17	0	0	0	0	0		0	0													0	0	0	0	0	1	0	3		2	end	1	end	end	end	end	1	end		end
	18	0	2	0	1	0		0	0													0	0	0	0	1	0	0	0		0		1					end
	19	0	1	0	2	0		0	0													1	0	1	0	0	0	0	1		0		1
	20	0	0	1	0	1		1	0													2	1	0	1	2	0	0	0		0		0
	21	0	0	0	0	0		0	0													1	0	0	1	0	1	1	0		0		1
	22	0	0	0	1	0		0	0													2	0	0	2	0	1	0	1		0		end
	23	0	0	0	1	0		0	1													1	1	0	0	0	0	0	0		1
	24	0	0	0	1	0		0	0													0	0	0	0	0	1	0	2		0
	25	0	0	0	0	0		0	0													0	0	0	1	0	0	1	1		0
	26	0	0	0	0	0		0	0													1	1	2	0	0	2	1	0		1
	27	0	3	0	1	0		0	0													0	1	0	0	1	0	1	0		end
	28	0	0	0	0	0		0	0													1	0	1	0	1	0	0	0

## Sheet: LL-DAR-3months
Temperature	Germination day	5℃				10℃				15℃				20℃				25℃				30℃				5/1℃				15/5℃				25/15℃
GA3 Concentration		0				0				0				0				0				0				0				0				0
Repeat		1	2	3	4	1	2	3	4	1	2	3	4	1	2	3	4	1	2	3	4	1	2	3	4	1	2	3	4	1	2	3	4	1	2	3	4
Final germination(dark)		0	0	0						0		0	0						0	5	4					0	0	0		5	3		3	1		1	1
Total sample(dark)		10	10	9						10		10	10						10	10	10					10	10	10		10	10		9	10		10	10
Number of decay(dark)			1							2		1	2						1	1	2					1		1		1	2		3				2
Number of fresh(dark)		10	9	9						8		9	8						9	4	4					9	10	9		4	5		3	9		9	7
Empty flat number(dark)
Final germination(light)		9	7		9	3	2		6	9	9		5	6	5		7	8	8		10		5	10	6	7	10		8	9	9		8	8	10		9
Total sample(light)		10	10		10	10	9		10	10	11		10	10	10		10	10	10		10		9	11	9	10	10		11	10	10		10	9	10		10
Number of decay(light)			1								1				5		1	2	2				4		3					1	1		1
Number of fresh(light)		1	2		1	7	7		4	1	1		5	4			2							1		3			3				1	1			1
Empty flat number(light)
	1	0	0		0	0	0		0	0	0		0	0	0		0	0	0		0		0	0	0	0	0	0	0	0	0		0	0	0		0
	2	0	0		0	0	0		0	0	0		0	0	0		0	0	0		0		0	0	0	0	0	0	0	0	0		0	0	0		0
	3	0	0		0	0	0		0	0	0		0	0	0		0	0	0		0		0	0	0	0	0	0	0	0	0		0	0	0		0
	4	0	0		0	0	0		0	0	0		0	0	0		0	0	1		0		0	0	0	0	0	0	0	0	0		0	0	0		0
	5	0	0		0	0	0		0	0	0		0	1	2		4	2	1		1		0	0	0	0	0	0	0	0	0		0	1	1		2
	6	0	0		0	0	0		0	2	1		1	3	3		2	3	1		6		0	0	0	0	0	0	0	0	0		0	3	5		5
	7	0	0		0	0	0		0	1	3		2	0	0		0	1	3		1		0	0	0	0	0	0	0	0	0		0	2	3		1
	8	0	0		0	0	0		2	3	2		1	0	0		0	0	2		0		0	0	0	0	0	0	0	0	0		0	1	0		0
	9	0	0		0	0	1		1	0	2		0	0	0		0	0	0		1		0	0	0	0	0	0	0	0	0		0	0	0		0
	10	0	0		0	0	0		0	3	0		0	0	0		0	0	0		0		0	1	2	0	0	0	0	0	1		1	0	1		0
	11	0	0		0	0	0		0	0	1		0	0	0		0	1	0		1		0	1	0	0	0	0	0	4	3		3	1	end		1
	12	0	0		0	1	1		1	0	0		0	1	0		0	0	0		end		0	2	0	0	0	0	0	3	1		2	0			0
	13	0	0		0	1	0		1	0	0		0	0	0		0	0	0				1	1	1	0	0	0	0	0	1		0	0			0
	14	1	0		0	1	0		0	0	0		0	0	0		0	0	0				1	0	0	0	0	0	0	1	1		0	0			0
	15	0	1		0	0	0		0	0	0		0	0	0		0	0	0				1	0	0	0	0	0	0	0	0		1	0			0
	16	2	0		1	0	0		1	0	0		0	0	0		0	0	0				0	1	0	0	0	0	0	0	2		0	0			0
	17	0	1		2	0	0		0	0	0		0	0	0		0	0	0				0	1	1	0	0	0	0	1	end		1	0			0
	18	0	0		1	0	0		0	0	0		0	0	0		0	0	0				2	1	1	0	0	0	0	0			0	0			0
	19	0	1		2	0	0		0	0	0		0	0	0		0	0	0				0	0	0	0	0	0	0	end			0	0			0
	20	1	1		2	0	0		0	0	0		0	0	0		0	0	0				0	0	0	0	0	end	0				0	0			0
	21	3	0		1	0	0		0	0	0		0	0	0		1	0	0				0	0	0	1	1		0				0	0			0
	22	1	0		0	0	0		0	0	0		0	0	0		0	1	0				0	0	1	1	1		0				0	0			0
	23	0	0		0	0	0		0	0	0		0	0	end		0	0	end				0	0	0	1	4		2				0	0			0
	24	1	0		0	0	0		0	0	0		1	0			0	0					0	0	0	2	2		1				0	0			0
	25	0	1		0	0	0		0	0	0		0	0			0	0					0	0	0	0	1		3				0	0			0
	26	0	2		0	0	0		0	0	0		0	0			0	0					0	0	0	1	1		2				0	0			0
	27	0	0		0	0	0		0	0	0		0	1			0	0					0	1	0	0	end		0				0	0			0
2022-03-26	28	0	0		0	0	0		0	0	0		0	0			0	0					0	1	0	1			1				0	0			0

## Sheet: LL-CS-3months
Temperature	Germination day	5℃				10℃				15℃				20℃				25℃				30℃				5/1℃				15/5℃				25/15℃
GA3 Concentration		0				0				0				0				0				0				0				0				0
Repeat		1	2	3	4	1	2	3	4	1	2	3	4	1	2	3	4	1	2	3	4	1	2	3	4	1	2	3	4	1	2	3	4	1	2	3	4
Final germination(dark)		5	10	3	8					12	14	13	13					12	15	15	14					7	5	5	7	13	14	15	14	15	15	14	12
Total sample(dark)		15	15	15	15					15	15	15	15					15	15	16	14					15	15	15	15	15	15	15	15	15	15	15	15
Number of decay(dark)					1																								1				1
Number of fresh(dark)		10	5	12	6					3	1	2	2					3		1						8	10	10	7	2	1					1	3
Empty flat number(dark)
Final germination(light)		11	17	14	15	15	15	13	16	13	15	12	12	13	14	14	13	14	12	16	12	12	10	9	13	14	12	13	13	14	15	14	18	20	20	20	20
Total sample(light)		15	18	15	15	15	15	15	16	16	15	15	15	15	15	14	13	14	14	16	13	12	16	10	14	15	14	15	15	14	16	15	18	20	20	20	20
Number of decay(light)		4	1	1				2		3		3	3	2	1				2		1		6	1	1		2		2		1	1
Number of fresh(light)																			1							1		2
Empty flat number(light)																		2			3									2
	1	0	0	0	0	0	0	0	0	0	0	0	0	0	0	0	0	0	0	0	0	0	0	0	0	0	0	0	0	0	0	0	0	0	0	0	0
	2	0	0	0	0	0	0	0	0	0	0	0	0	0	0	0	0	0	0	0	0	0	0	0	0	0	0	0	0	0	0	0	0	0	0	0	0
	3	0	0	0	0	0	0	0	0	1	0	0	0	6	8	8	7	2	3	3	3	0	0	0	0	0	0	0	0	0	0	0	0	0	0	0	0
	4	0	0	0	0	0	0	0	0	1	2	0	0	5	3	4	2	4	2	3	2	0	0	0	0	0	0	0	0	0	0	0	0	0	0	0	0
	5	0	0	0	0	0	0	0	0	9	13	11	9	2	3	2	4	5	5	8	4	0	0	0	0	0	0	0	0	0	0	0	0	0	0	0	0
	6	0	0	0	0	0	0	1	0	2	end	1	2	end	end	end	end	2	1	0	2	0	0	0	0	0	0	0	0	0	0	0	0	0	0	0	0
	7	0	0	0	0	4	4	2	9	0		0	0					1	1	1	1	0	0	0	1	0	0	0	0	3	0	1	2	20	20	20	20
	8	0	1	0	0	5	10	6	6	0		0	1					0	0	1	0	0	2	0	0	0	0	0	0	5	7	7	9	end	end	end	end
	9	0	2	0	1	5	1	1	1	0		0	0					0	0	end	0	1	0	1	1	0	0	0	0	4	6	6	2
	10	0	0	0	0	0	end	1	end	end		end	end					0	0		0	3	0	1	1	0	0	0	0	1	2	end	2
	11	6	5	7	5	0		1										0	0		0	4	0	3	0	0	0	0	0	1	end		3
	12	3	5	4	3	0		0										0	0		0	0	2	0	0	0	0	0	0	0			end
	13	2	2	2	3	0		0										0	0		0	0	0	1	3	0	0	0	1	0
	14	0	1	0	0	1		1										0	0		0	0	1	1	1	0	0	0	0	0
	15	0	0	1	2	end		0										0	0		0	1	1	2	2	1	0	0	1	0
	16	0	0	0	0			end										0	0		0	2	3	0	2	2	1	1	0	0
	17	0	1	0	1													0	0		0	0	0	0	0	3	3	2	3	0
	18	0	0	0	end													0	0		0	0	0	0	0	1	2	3	2	0
	19	end	end	end														end	end		end	0	0	0	1	2	2	2	4	end
	20																					1	1	0	1	3	2	4	1
	21																					end	0	0	0	1	1	0	1
	22																						0	0	0	1	1	1	0
	23																						0	0	0	0	end	0	0
	24																						0	0	0	0		0	0
	25																						0	0	0	0		0	0
	26																						0	0	0	0		0	0
	27																						0	0	0	0		0	0
	28																						0	0	0	0		0	0

## Sheet: LL-DAR-6months
Temperature	Germination day	5℃				10℃				15℃				20℃				25℃				30℃				5/1℃				15/5℃				25/15℃
GA3 Concentration		0				0				0				0				0				0				0				0				0
Repeat		1	2	3	4	1	2	3	4	1	2	3	4	1	2	3	4	1	2	3	4	1	2	3	4	1	2	3	4	1	2	3	4	1	2	3	4
Final germination(dark)		1	0	1	1					1	2	0	1					1	2	1	0					0	0	0	0	3	0	0	1	1	3	1	0
Total sample(dark)		10	10	10	10					10	10	9	10					10	9	10	10					10	10	10	10	13	10	8	11	10	10	10	10
Number of decay(dark)										1	2							5		3	1					1	2	1							1	2
Number of fresh(dark)		9	10	9	9					8	6	9	9					4	7	6	9					9	8	9	10	10	10	8	10	9	6	7	10
Empty flat number(dark)												1
Final germination(light)		4	5	7	4	10	9	8	10	6	9	9	8	13	11	11	15	7	10	9	7	9	6	5	5	3	3	5	6	8	9	10	9	8	5	7	10
Total sample(light)		11	11	10	11	11	10	9	10	10	10	10	10	14	13	14	15	10	10	10	10	10	10	10	10	9	10	10	10	10	10	10	10	10	10	10	11
Number of decay(light)			2		2		1	1		4			2	1	1	1		2		1	1		3	4	4	2	2			2			1		5		1
Number of fresh(light)		7	4	3	5	1					1	1			1	2		1			2	1	1	1	1	4	5	5	4		1			2		3
Empty flat number(light)								1							1	2										1
	1	0	0	0	0	0	0	0	0	0	0	0	0	0	0	0	0	0	0	0	0	0	0	0	0	0	0	0	0	0	0	0	0	0	0	0	0
	2	0	0	0	0	0	0	0	0	0	0	0	0	0	0	0	0	0	0	0	0	0	0	0	0	0	0	0	0	0	0	0	0	0	0	0	0
	3	0	0	0	0	0	0	0	0	0	0	0	0	0	0	0	0	0	0	0	0	0	0	0	0	0	0	0	0	0	0	0	0	0	0	0	0
	4	0	0	0	0	0	0	0	0	0	0	0	0	0	0	0	0	0	0	0	0	0	0	0	0	0	0	0	0	0	0	0	0	0	0	0	0
	5	0	0	0	0	0	0	0	0	1	2	2	1	4	3	4	4	2	3	4	2	0	0	0	0	0	0	0	0	0	0	0	0	0	0	0	0
	6	0	0	0	0	0	0	0	0	4	3	4	5	5	4	3	3	1	3	1	3	0	0	0	0	0	0	0	0	0	0	0	0	6	2	3	6
	7	0	0	0	0	0	0	1	1	0	3	1	1	3	2	3	3	1	1	2	1	0	0	0	0	0	0	0	0	0	0	0	0	0	2	2	2
	8	0	0	0	0	1	0	2	1	1	1	1	1	0	0	1	2	2	1	2	0	0	0	0	0	0	0	0	0	0	0	0	0	1	0	1	1
	9	0	0	0	0	3	7	4	3	0	0	1	0	0	0	0	2	0	1	end	0	0	0	0	1	0	0	0	0	5	4	4	5	0	0	1	1
	10	0	0	0	0	2	1	1	1	0	0	0	0	1	1	0	1	0	0		1	2	0	1	0	0	0	0	0	1	2	3	3	1	0	0	0
	11	1	0	2	1	3	1	0	0	0	0	0	0	end	0	0	end	1	0		0	2	0	0	0	0	0	0	0	1	1	2	1	0	0	0	0
	12	0	1	2	0	0	end	0	1	0	0	0	0		1	0		0	1		0	0	1	0	0	0	0	0	0	1	1	0	0	0	1	0	0
	13	0	1	1	1	0		0	2	0	0	0	0		end	0		0	end		0	0	1	0	0	0	0	0	0	end	0	1	0	0	0	0	0
	14	0	1	0	1	0		0	0	0	0	0	0			0		0			0	0	0	0	0	0	0	0	0		1	end	end	0	0	0	0
	15	0	0	1	0	0		0	0	0	0	0	0			0		0			0	2	1	1	2	1	0	0	0		0			0	0	0	0
	16	1	1	0	1	0		0	0	0	0	0	0			end		0			0	0	0	0	0	0	0	0	0		0			0	0	0	0
	17	1	1	0	0	0		0	0	0	0	0	0					0			0	1	0	0	1	0	0	0	0		0			0	0	0	0
	18	0	0	0	0	0		0	0	0	0	0	0					0			0	0	0	0	0	1	0	0	1		end			0	0	0	0
	19	1	0	0	0	0		0	1	0	0	0	0					0			0	0	0	0	0	1	0	0	1					0	0	0	0
	20	0	0	1	0	0		0	end	end	end	end	end					end			end	1	0	1	0	0	0	0	0					0	0	0	0
	21	0	0	0	0	1		0														1	1	2	1	0	1	0	0					0	0	0	0
	22	0	0	0	0	end		end														0	0	0	0	0	0	1	0					0	0	0	0
	23	0	0	0	0																	0	1	0	0	0	0	0	1					0	0	0	0
	24	0	0	0	0																	0	0	0	0	0	1	1	1					0	0	0	0
	25	0	0	0	0																	0	0	0	0	0	1	1	0					end	end	end	end
	26	0	0	0	0																	0	1	0	0	0	0	1	1
	27	0	0	0	0																	0	0	0	0	0	0	0	0
	28	0	0	0	0																	0	0	0	0	0	0	1	1

## Sheet: LL-CS-6months
Temperature	Germination day	5℃				10℃				15℃				20℃				25℃				30℃				5/1℃				15/5℃				25/15℃
GA3 Concentration		0				0				0				0				0				0				0				0				0
Repeat		1	2	3	4	1	2	3	4	1	2	3	4	1	2	3	4	1	2	3	4	1	2	3	4	1	2	3	4	1	2	3	4	1	2	3	4
Final germination(dark)		4	8	6	9					10	10	8	10					10	10	9	10					2	2	3	4	9	10	9	10	10	10	9	9
Total sample(dark)		10	10	10	10					10	10	10	10					10	10	10	10					10	10	10	10	10	10	10	10	10	10	10	10
Number of decay(dark)		1										2								1										1		1				1	1
Number of fresh(dark)		5	2	4	1																					8	8	7	6
Empty flat number(dark)
Final germination(light)		10	12	10	7	10	9	10	8	10	10	9	10	9	10	10	10	10	8	3	7	5	7	5	7	11	8	8	6	10	9	9	10	10	10	10	10
Total sample(light)		10	12	10	9	10	9	10	10	10	10	9	10	10	10	10	10	10	10	8	10	10	10	10	10	12	11	10	11	10	10	10	10	10	10	10	10
Number of decay(light)					2				1					1					2	5	3	3	3	2	3		1	1	1		1
Number of fresh(light)									1													2		3		1	2	1	4			1
Empty flat number(light)					1		1													1
	1	0	0	0	0	0	0	0	0	0	0	0	0	0	0	0	0	0	0	0	0	0	0	0	0	0	0	0	0	0	0	0	0	0	0	0	0
	2	0	0	0	0	0	0	0	0	0	0	0	0	0	0	1	0	0	0	0	0	0	0	0	0	0	0	0	0	0	0	0	0	0	0	0	0
	3	0	0	0	0	0	0	0	0	0	1	1	2	1	2	3	2	1	3	0	2	0	0	0	0	0	0	0	0	0	0	0	0	1	3	1	4
	4	0	0	0	0	1	1	3	0	1	0	0	3	6	8	6	6	6	3	1	2	0	1	1	5	0	0	0	0	0	0	0	0	9	5	8	3
	5	0	0	0	0	3	1	0	1	6	6	6	5	2	end	end	2	3	1	2	3	0	1	1	1	0	0	0	0	3	5	3	4	end	1	1	2
	6	0	0	0	0	3	4	3	5	3	1	2	end	end			end	end	1	0	0	1	1	1	0	0	0	0	0	5	2	2	5		1	end	1
	7	0	0	0	0	2	1	2	1	end	1	end							end	end	end	0	1	0	0	0	0	0	0	1	1	1	1		end		end
	8	0	0	0	0	1	2	2	1		1											1	1	1	0	0	0	0	0	1	1	2	end
	9	3	2	5	5	end	end	end	end		end											1	0	0	1	0	0	0	0	end	end	1
	10	2	3	3	1																	1	0	0	0	0	0	0	0			end
	11	5	7	1	1																	1	1	1	0	0	0	0	0
	12	end	end	0	0																	0	0	0	0	0	1	0	1
	13			1	0																	0	0	0	0	0	1	0	1
	14			end	end																	0	1	0	0	0	1	1	0
	15																					0	0	0	0	0	0	0	0
	16																					0	0	0	0	1	0	1	0
	17																					0	0	0	0	0	0	0	0
	18																					0	0	0	0	1	0	1	0
	19																					0	0	0	0	1	1	0	0
	20																					0	0	0	0	2	1	2	0
	21																					0	0	0	0	1	2	3	0
	22																					end	end	end	end	1	0	0	1
	23																									1	0	0	0
	24																									0	0	0	0
	25																									1	1	0	1
	26																									2	0	0	1
	27																									0	0	0	0
	28																									0	0	0	0
